# Supplementary material for: Information and vaccine hesitancy: Evidence from the early stage of the vaccine roll-out in 28 European countries
Source: PubMed Central journal article supplement (PMC9491558; doi:10.1371/journal.pone.0273555), 2022-09-21
Supplement: pone.0273555.s001.pdf [file pone.0273555.s001.pdf]

1 **S1 Appendix – Parallel trend assumption**

2

3 The difference-in-difference (DID) technique is typically used to estimate the effect of a specific event, by comparing the  
4 changes in outcomes over time between the treatment and the control group. The DID design uses data from both groups  
5 to obtain an appropriate counterfactual with the goal of making causal interpretation. However, a critical requirement is  
6 that prior to the event, treatment and control group should have parallel trends in terms of the outcome. Violation of this  
7 assumption leads to bias and compromises any causal interpretation. The parallel trend assumption can be checked  
8 through visual inspection. Figure A.1 depicts the two trends for the treated and the control group before the suspension  
9 of the AstraZeneca vaccine (our treatment).

10

11

**Figure A.1: Parallel trend assumption**

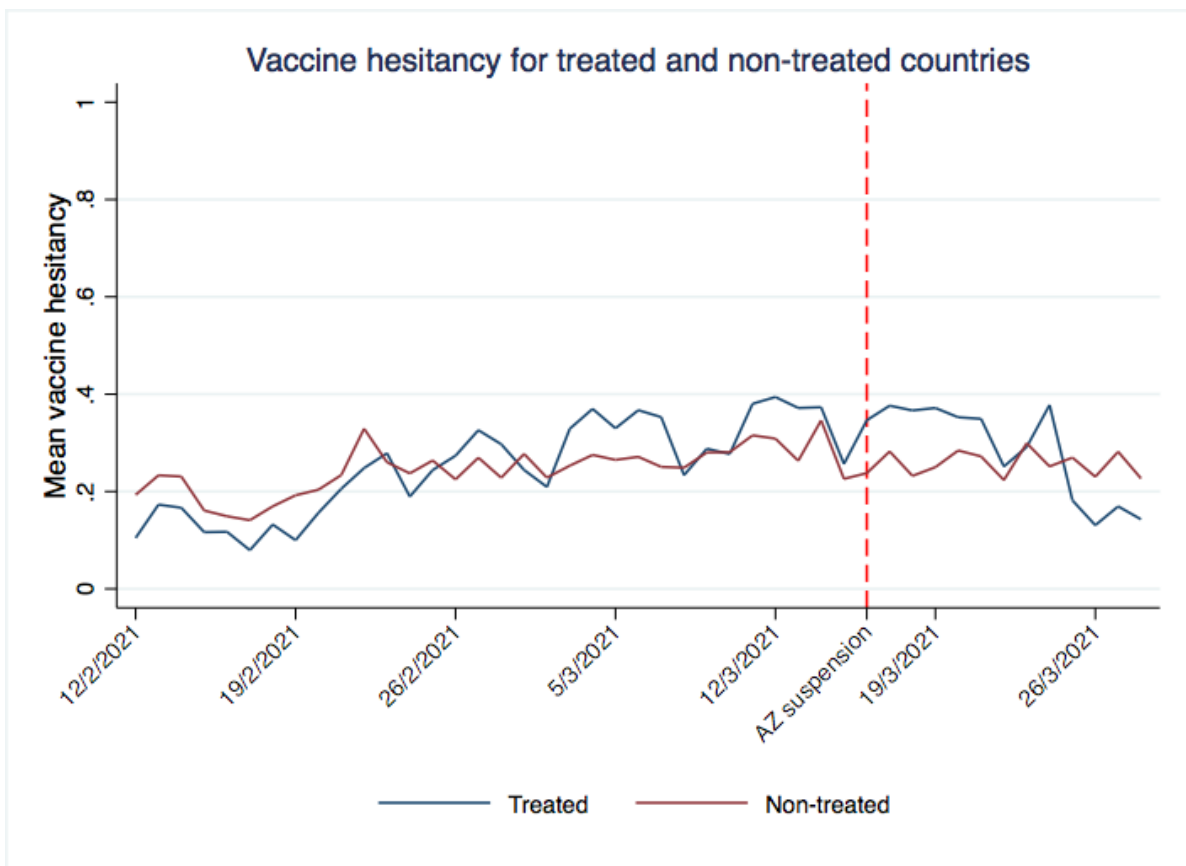

12

13

14 Whereas the trends are similar overall, we take note that the trend for those who have been treated fluctuates more.  
15 Because of this, we further test the assumption with the help of regressions, but restricted to set time intervals. The model  
16 we use is described by equation (A1):

17

$$18 \quad VH_{itc} = \alpha + \beta_1 Trend_{it} + \beta_2 Treated_t + \beta_3 Treated_t * Trend_{it} + \gamma' X_{ic} + \epsilon_{ict} \quad (A1)$$

19

20 where *Trend* is a continuous variable equal to the day when the individuals were interviewed, *Treated* is a dummy equal  
 21 to 1 if the individual lives in a country which suspended the AstraZeneca vaccine and 0 otherwise. *X* represents a set of  
 22 individual characteristics such as gender, age, education, having tested positive to COVID-19 and know someone who  
 23 died because of coronavirus.

24

25 We are interested on the coefficient of the interaction between *Treated* and *Trend* since this would indicate a deviation  
 26 from the parallel trend assumption. In Table A.1, we present the estimates obtained through equation (A1) for 5 segments  
 27 of the trend. We can see that the coefficient corresponding to the interaction is significant (0.011, p-value=0.057) only in  
 28 week 2 (19 February – 25 February), meaning that in this period vaccine hesitancy grows faster for countries which  
 29 suspended AstraZeneca vaccine. On the contrary, for the other segments of time it seems that the parallel trend assumption  
 30 holds, since all other interaction coefficients are not significant.

31

32

**Table A.1: regression results parallel trend assumption**

| VACCINE HESITANCY    |              |              |                    |              |              |
|----------------------|--------------|--------------|--------------------|--------------|--------------|
|                      | WEEK 1       | WEEK 2       | WEEK 3             | WEEK 4       | WEEK 5       |
|                      | (12-18 Feb.) | (19-25 Feb.) | (26 Feb. - 4 Mar.) | (5 - 11 Mar) | (12-15 Mar.) |
| <b>Trend</b>         | -0.003       | 0.003        | 0.003              | 0.002        | -0.019       |
|                      | (0.004)      | (0.005)      | (0.004)            | (0.006)      | (0.013)      |
| <b>Treated</b>       | -0.069***    | -0.090***    | 0.040*             | 0.084***     | 0.119**      |
|                      | (0.022)      | (0.032)      | (0.024)            | (0.028)      | (0.055)      |
| <b>Treated*Trend</b> | 0.006        | 0.011*       | 0.002              | -0.008       | -0.021       |
|                      | (0.004)      | (0.006)      | (0.005)            | (0.008)      | (0.018)      |
| Observations         | 10,600       | 6,523        | 7,149              | 4,721        | 1,884        |

Robust standard errors in parentheses

\*\*\* p<0.01, \*\* p<0.05, \* p<0.1

33 Notes: Estimation results from equation A1, where the treated (controls) represents individuals living in a country where the  
 34 AstraZeneca vaccine was (NOT) suspended by 16 March. Control variables are included: gender; education; age; having tested  
 35 positive to COVID-19; and knowing someone who died because of coronavirus
