# Supplementary material for: Information and vaccine hesitancy: Evidence from the early stage of the vaccine roll-out in 28 European countries
Source: PubMed Central journal article supplement (PMC9491558; doi:10.1371/journal.pone.0273555), 2022-09-21
Supplement: pone.0273555.s002.pdf [file pone.0273555.s002.pdf]

1 **S2 Appendix – List of suspension dates in the 17 countries**

2

| <b>Date</b> | <b>Countries</b>                                                                                |
|-------------|-------------------------------------------------------------------------------------------------|
| 07/03/21    | Austria                                                                                         |
| 11/03/21    | Romania, Denmark                                                                                |
| 12/03/21    | Bulgaria                                                                                        |
| 14/03/21    | Ireland                                                                                         |
| 15/03/21    | France, Germany, Italy,<br>Spain, Luxembourg, Cyprus,<br>Portugal, Slovenia, the<br>Netherlands |
| 16/03/21    | Sweden, Latvia                                                                                  |

11

12

13 *Source: Which countries have stopped using AstraZeneca's COVID vaccine?, March 2021, available here:*

14 <https://www.aljazeera.com/news/2021/3/15/which-countries-have-halted-use-of-astrazenecas-covid-vaccine>
