# Supplementary material for: Information and vaccine hesitancy: Evidence from the early stage of the vaccine roll-out in 28 European countries
Source: PubMed Central journal article supplement (PMC9491558; doi:10.1371/journal.pone.0273555), 2022-09-21
Supplement: pone.0273555.s003.pdf [file pone.0273555.s003.pdf]

1 S3 Appendix – Percentage of respondents who received at least one dose of a vaccine, by country

|                    | <b>Received at least one<br/>dose of the vaccine (%)</b> | <b>Not<br/>vaccinated<br/>(%)</b> | <b>Not answered or<br/>missing (%)</b> |
|--------------------|----------------------------------------------------------|-----------------------------------|----------------------------------------|
| <b>Austria</b>     | 7.72                                                     | 80.26                             | 12.02                                  |
| <b>Belgium</b>     | 8.36                                                     | 79.35                             | 12.29                                  |
| <b>Bulgaria</b>    | 9.08                                                     | 73.28                             | 17.64                                  |
| <b>Croatia</b>     | 6.40                                                     | 81.87                             | 11.73                                  |
| <b>Cyprus</b>      | 4.83                                                     | 79.48                             | 15.68                                  |
| <b>Czechia</b>     | 3.98                                                     | 82.51                             | 13.51                                  |
| <b>Denmark</b>     | 4.33                                                     | 83.94                             | 11.73                                  |
| <b>Estonia</b>     | 9.89                                                     | 79.34                             | 10.78                                  |
| <b>Finland</b>     | 5.37                                                     | 86.48                             | 8.15                                   |
| <b>France</b>      | 7.15                                                     | 79.09                             | 13.76                                  |
| <b>Germany</b>     | 4.47                                                     | 84.68                             | 10.85                                  |
| <b>Greece</b>      | 8.18                                                     | 73.34                             | 18.47                                  |
| <b>Hungary</b>     | 8.86                                                     | 77.69                             | 13.45                                  |
| <b>Ireland</b>     | 7.38                                                     | 87.98                             | 4.64                                   |
| <b>Italy</b>       | 7.85                                                     | 80.52                             | 11.63                                  |
| <b>Latvia</b>      | 6.25                                                     | 76.70                             | 17.05                                  |
| <b>Lithuania</b>   | 7.08                                                     | 80.95                             | 11.98                                  |
| <b>Luxembourg</b>  | 4.04                                                     | 88.51                             | 11.49                                  |
| <b>Malta</b>       | 18.19                                                    | 68.80                             | 13.01                                  |
| <b>Netherlands</b> | 3.11                                                     | 83.10                             | 13.79                                  |
| <b>Poland</b>      | 10.73                                                    | 68.92                             | 20.35                                  |
| <b>Portugal</b>    | 5.09                                                     | 87.61                             | 7.30                                   |
| <b>Romania</b>     | 20.06                                                    | 66.63                             | 13.32                                  |
| <b>Slovakia</b>    | 8.08                                                     | 77.37                             | 14.56                                  |
| <b>Slovenia</b>    | 5.84                                                     | 80.78                             | 13.38                                  |
| <b>Spain</b>       | 4.45                                                     | 86.70                             | 8.85                                   |

|                     |             |              |              |
|---------------------|-------------|--------------|--------------|
| <b>Sweden</b>       | 5.23        | 84.41        | 10.36        |
| <b>UK</b>           | 22.09       | 70.93        | 6.98         |
| <b>Whole sample</b> | <b>7.87</b> | <b>78.80</b> | <b>13.33</b> |

2

3 *Source: Elaboration of our data. Data come from the third wave of the Eurofound “Living, Working and COVID-19”*
